# Supplementary material
Source: PubMed Central journal article supplement (PMC3017193)
Supplement: 1017419108_pnas.201017419SI.pdf [file 1017419108_pnas.201017419SI.pdf]

# Supporting Information

Zhao et al. 10.1073/pnas.1017419108

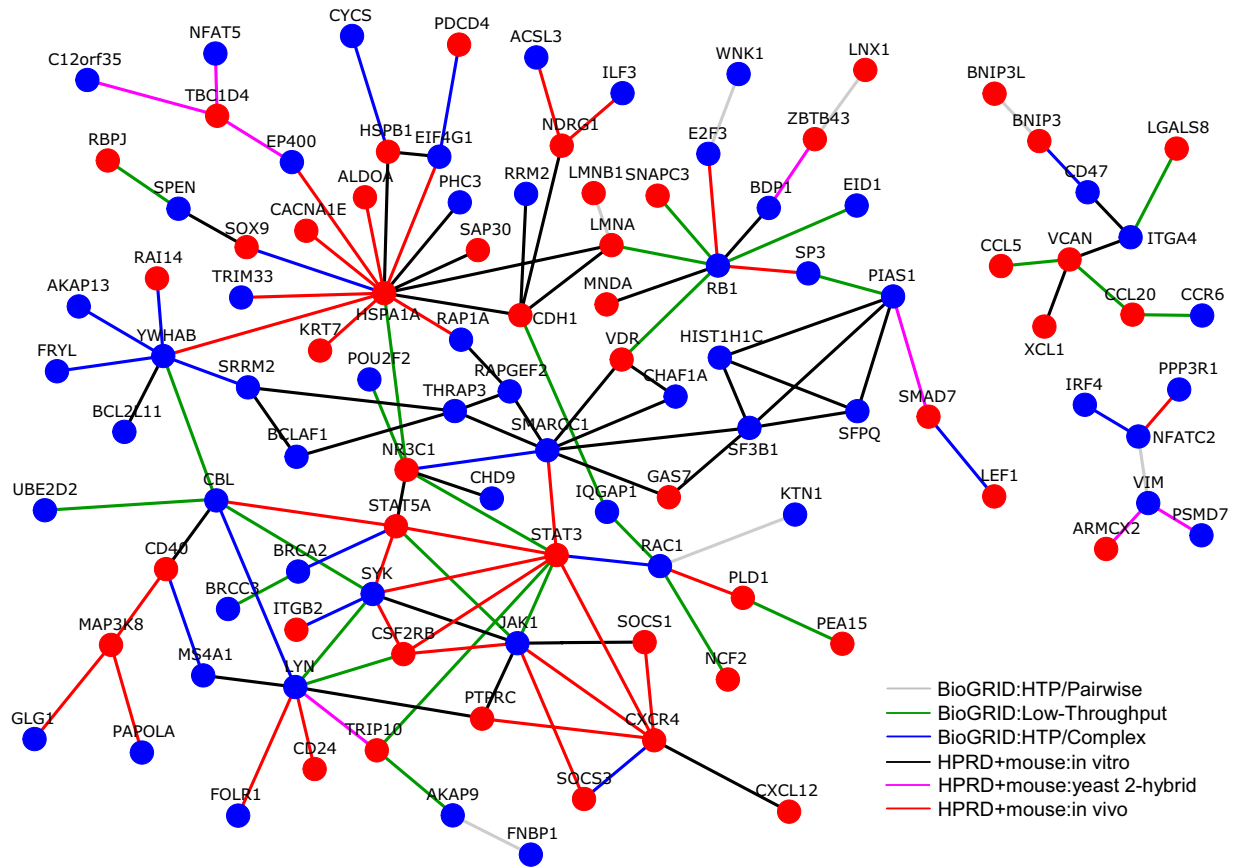

**Fig. S1.** EBNA3C-regulated gene protein networks. EBNA3C up-regulated (red) or down-regulated (blue) genes were imported into Pathway Palette and searched for protein interactions in the BioGRID and HPRD databases. This search yielded three networks with more than six nodes. The Edge color indicates the source interaction database. BioGRID HTP Pairwise is light gray, BioGRID LTP is green, BioGRID HTP Complex is blue, HPRD+ mouse, in vitro, is black, HPRD +yeast-2-hybrid is pink, and HPRD+ mouse, in vivo, is red.

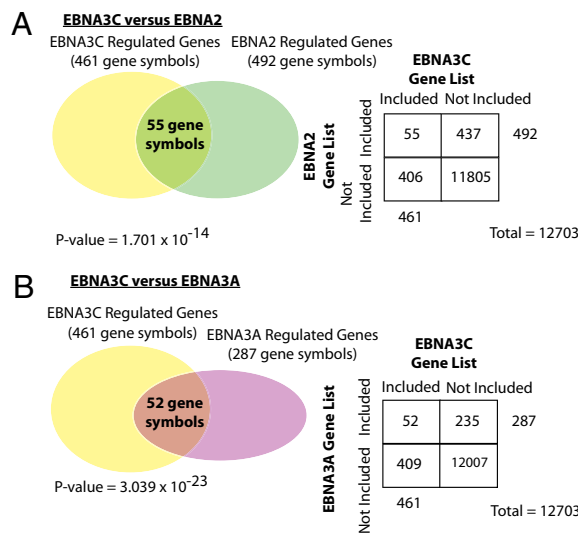

**Fig. S2.** Venn diagrams showing the overlap of EBNA3C and EBNA2 (A) or EBNA3C and EBNA3A (B) regulated genes.

## Other Supporting Information Files

[Dataset S1 \(XLS\)](#)

[Dataset S2 \(XLS\)](#)

[Dataset S3 \(XLS\)](#)

[Dataset S4 \(XLS\)](#)

[Dataset S5 \(XLS\)](#)

[Dataset S6 \(XLS\)](#)
